# Supplementary material for: Characterization of HNRNPA1 mutations defines diversity in pathogenic mechanisms and clinical presentation
Source: PubMed Central journal article supplement (PMC8410042; doi:10.1172/jci.insight.148363), 2021-07-22
Supplement: jciinsight-6-148363-s052.pdf [file jciinsight-6-148363-s052.pdf]

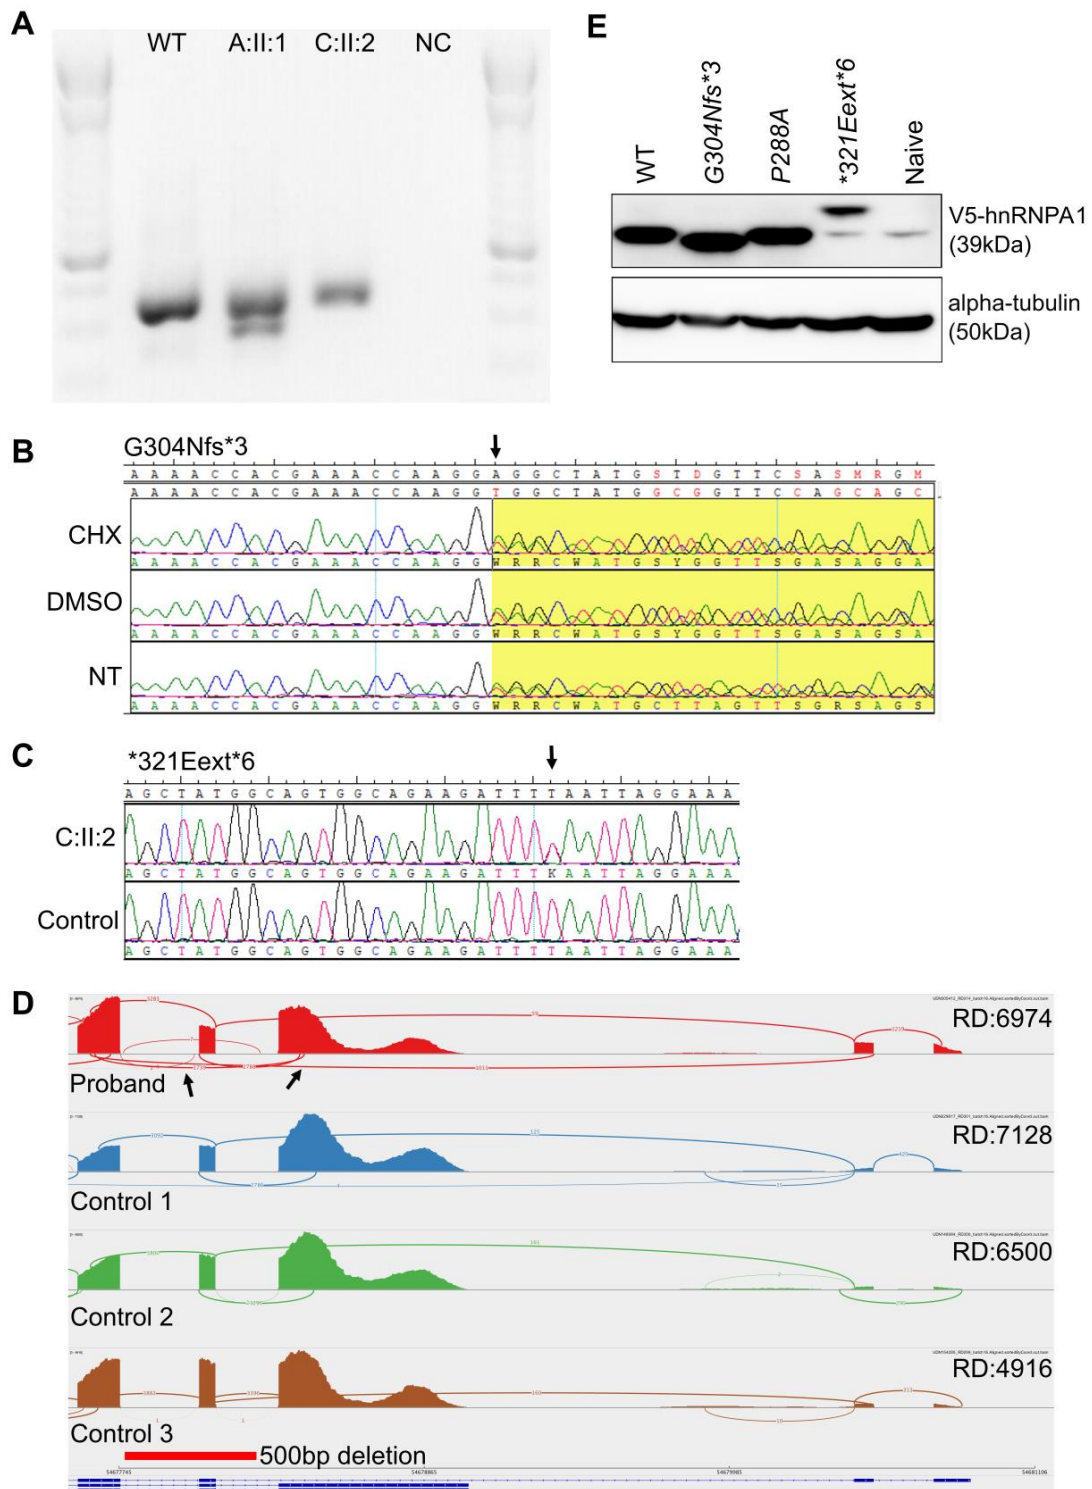

**Fig. A1 Validation of HNRNPA1 mutations on mRNA level and splicing, as well as protein expression in HeLa overexpression model**

**A.** cDNA PCR results on agarose gel showing presence of shorter transcript in family A in addition to the wild-type band. Second transcript for family C is not visible on gel. **B.** cDNA sequencing at mutation site for the G304fs\*3 mutation in family A, showing the mutation in heterozygous state in all three conditions (cycloheximide CHX, vehicle control DMSO and non-treated NT), thus not subjected to nonsense-mediated decay. **C.** Sanger sequencing of cDNA of patient C:II:2 and a healthy control, showing the presence of the \*321Eext\*6 mutation on mRNA level **D.** Sashimi plot demonstrating abnormal skipping of exon 9 NM\_002136.4 (indicated by arrows) in D:II:1 proband (top row) when compared to control samples. Read depth (RD) listed per sample. The 500bp deletion shown as relative to the genomic location and NM\_002136.4 transcript **E.** Western blot results of transfected HeLa cells with HNRNPA1-constructs showing bands of the expected size for all mutants. Wild-type HNRNPA1-V5 results in a band of approximately 39kDa, as does the P288A mutant. Whereas the G304Nfs\*3 and the \*321Eext\*6 mutations result in a slightly smaller and slightly larger protein respectively.

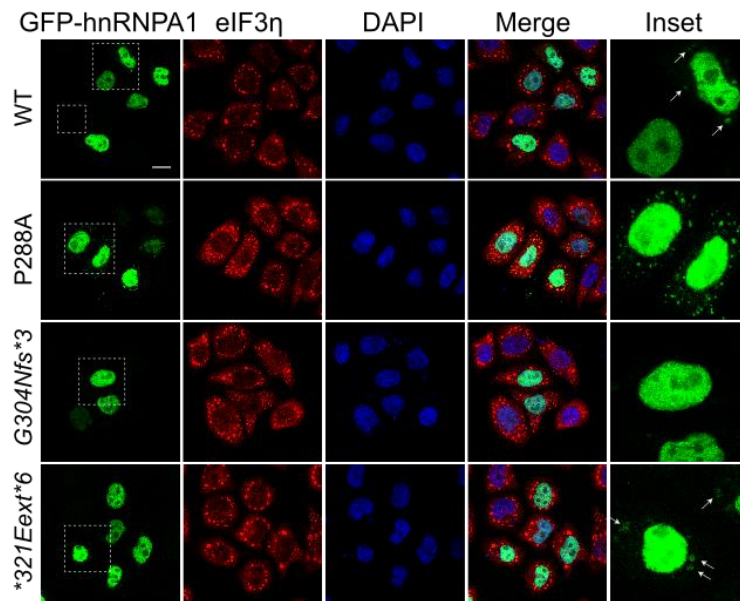

**Fig. A2 Localization of the hnRNP1 mutants subjected to heat shock**

HeLa cells were transiently transfected with WT or mutant EGFP-tagged hnRNP1 and subjected to heat shock treatment (temperature change from 37 °C to 43 °C for 30 min). Cells were fixed and stained with eIF3 $\eta$  (red) and DAPI (blue). Confocal images were taken for partition coefficient analysis, scale bar indicates 10  $\mu$ m.

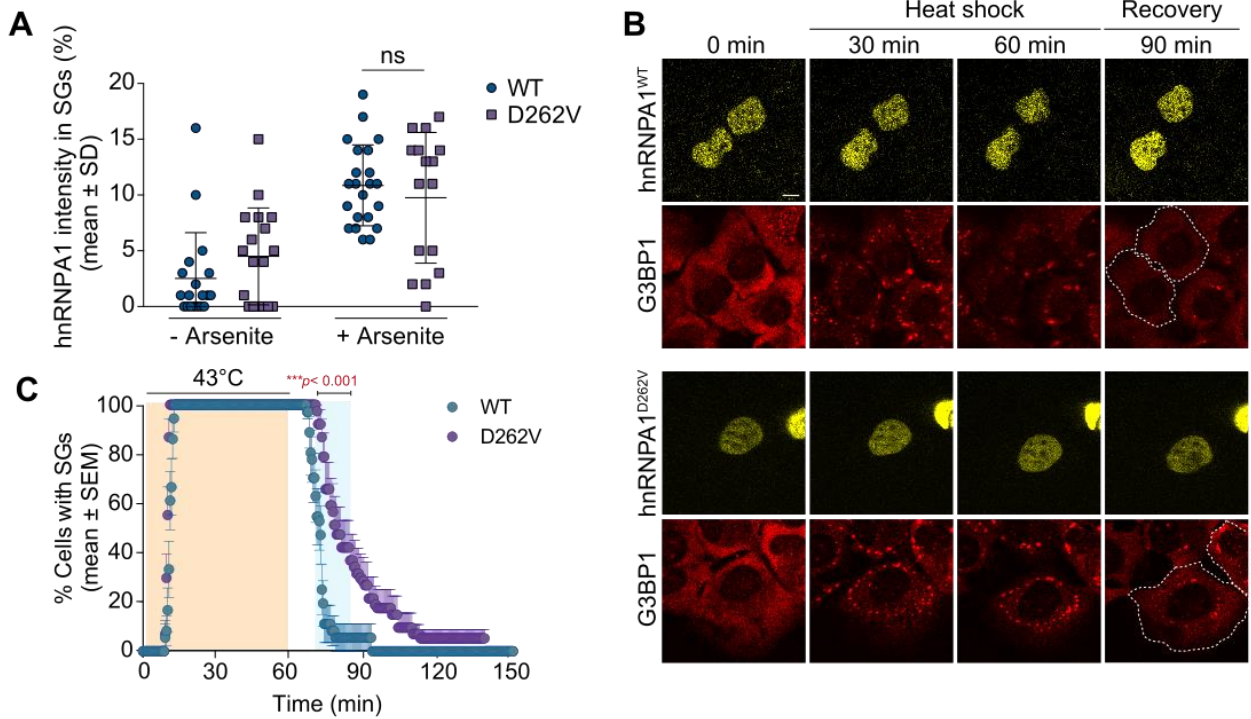

**Fig. A3 Localization and stress granule dynamics of the hnRNPA1 D262V mutant**

**A.** HeLa cells were transiently transfected with WT or mutant EGFP-tagged hnRNPA1 and subjected to arsenite stress (0.5 mM sodium arsenite, 30 min). Cells were fixed and stained with DAPI, eIF3 $\eta$ , and G3BP, and the intensity of hnRNPA1 signal in stress granules in each cell was measured. An interleaved scatter plot with individual data points is shown. Error bars represent mean  $\pm$  SD ( $n = 18$  and  $22$  cells for hnRNPA1 and hnRNPA1<sup>D262V</sup>, respectively). ns, not significant by two-way ANOVA with Sidak's multiple comparisons test. Scale bar, 10  $\mu$ m. **B,C.** U2OS cells expressing tdTomato-tagged endogenous G3BP1 were transiently transfected with WT or mutant EYFP-tagged hnRNPA1 and subjected to heat shock (43  $^{\circ}$ C, 60 min; orange shading) and allowed to recover at 37  $^{\circ}$ C for 2 h. White dotted lines delineate hnRNPA1-positive cells. Line graph in c represents the percentage of cells with visible tdTomato-G3BP1 puncta over time ( $n = 18$  and  $19$  videos for hnRNPA1 and hnRNPA1<sup>D262V</sup>, respectively). Blue shaded area indicates time points at which D262V mutant was statistically significantly different from WT. \*\*\* $p < 0.001$ , by two-way ANOVA with Sidak's multiple comparisons test. Scale bar, 10  $\mu$ m.

**Table A1 Overview of genetic methods used for generation and analysis of NGS data**

|                                       | Family A                                                                                                                                                                                                                                                                                                                                                                          | Family B                                                                                                                                                                                                                                                                                                                                                                          | Family C                                                                                                                                                                                                                                                                                                                                                                          | Family D                                                                                                                                                                                                                                                                                                                                                                                                                                                                                                                                                                            | Family E                                                                                                                                                                                          | Family F                                                                                                                                                                                                                                                                                                                                                                                                                                                                                                                           |
|---------------------------------------|-----------------------------------------------------------------------------------------------------------------------------------------------------------------------------------------------------------------------------------------------------------------------------------------------------------------------------------------------------------------------------------|-----------------------------------------------------------------------------------------------------------------------------------------------------------------------------------------------------------------------------------------------------------------------------------------------------------------------------------------------------------------------------------|-----------------------------------------------------------------------------------------------------------------------------------------------------------------------------------------------------------------------------------------------------------------------------------------------------------------------------------------------------------------------------------|-------------------------------------------------------------------------------------------------------------------------------------------------------------------------------------------------------------------------------------------------------------------------------------------------------------------------------------------------------------------------------------------------------------------------------------------------------------------------------------------------------------------------------------------------------------------------------------|---------------------------------------------------------------------------------------------------------------------------------------------------------------------------------------------------|------------------------------------------------------------------------------------------------------------------------------------------------------------------------------------------------------------------------------------------------------------------------------------------------------------------------------------------------------------------------------------------------------------------------------------------------------------------------------------------------------------------------------------|
| <b>NGS type</b>                       | WES                                                                                                                                                                                                                                                                                                                                                                               | WES                                                                                                                                                                                                                                                                                                                                                                               | WGS                                                                                                                                                                                                                                                                                                                                                                               | WGS                                                                                                                                                                                                                                                                                                                                                                                                                                                                                                                                                                                 | WES                                                                                                                                                                                               | WES                                                                                                                                                                                                                                                                                                                                                                                                                                                                                                                                |
| <b>Individuals with NGS</b>           | A:1:1                                                                                                                                                                                                                                                                                                                                                                             | B:1:1, B:1:2                                                                                                                                                                                                                                                                                                                                                                      | C:1:1, C:1:2, C:1:2, C:1:3:1                                                                                                                                                                                                                                                                                                                                                      | D:1:1, D:1:1, D:1:2                                                                                                                                                                                                                                                                                                                                                                                                                                                                                                                                                                 | E:1:2, E:1:1                                                                                                                                                                                      | F:1:1                                                                                                                                                                                                                                                                                                                                                                                                                                                                                                                              |
| <b>Exome capturing kit</b>            | Nextera Rapid Capture Expanded Exome kit (62Mb) (Illumina)                                                                                                                                                                                                                                                                                                                        | SeqCap EZ Human Exome Library v3.0 (64Mb) (Roche)                                                                                                                                                                                                                                                                                                                                 | -                                                                                                                                                                                                                                                                                                                                                                                 | -                                                                                                                                                                                                                                                                                                                                                                                                                                                                                                                                                                                   | SureSelect Clinical Research Exome V2 (Agilent)                                                                                                                                                   | Twist Human Core Exome kit + additional probes for human RefSeq transcripts (Twist Bioscience)                                                                                                                                                                                                                                                                                                                                                                                                                                     |
| <b>Sequencing platform</b>            | HiSeq 2500 (Illumina)                                                                                                                                                                                                                                                                                                                                                             | NextSeq 500 (Illumina)                                                                                                                                                                                                                                                                                                                                                            | HiSeq 2500 (Illumina)                                                                                                                                                                                                                                                                                                                                                             | HiSeq X (Illumina)                                                                                                                                                                                                                                                                                                                                                                                                                                                                                                                                                                  | NovaSeq 6000 (Illumina)                                                                                                                                                                           | NextSeq 500/550 (Illumina)                                                                                                                                                                                                                                                                                                                                                                                                                                                                                                         |
| <b>Sequence alignment</b>             | Burrows-Wheeler Aligner (BWA) (83)                                                                                                                                                                                                                                                                                                                                                | Burrows-Wheeler Aligner (BWA) (83)                                                                                                                                                                                                                                                                                                                                                | Burrows-Wheeler Aligner (BWA) (83)                                                                                                                                                                                                                                                                                                                                                | Burrows-Wheeler Aligner (BWA) (83)                                                                                                                                                                                                                                                                                                                                                                                                                                                                                                                                                  | Burrows-Wheeler Aligner (BWA) (83)                                                                                                                                                                | Burrows-Wheeler Aligner (BWA) (83)                                                                                                                                                                                                                                                                                                                                                                                                                                                                                                 |
| <b>Reference genome</b>               | hg19, UCSC Genome Browser                                                                                                                                                                                                                                                                                                                                                         | hg19, UCSC Genome Browser                                                                                                                                                                                                                                                                                                                                                         | hg19, UCSC Genome Browser                                                                                                                                                                                                                                                                                                                                                         | hg19, UCSC Genome Browser                                                                                                                                                                                                                                                                                                                                                                                                                                                                                                                                                           | hg19, UCSC Genome Browser                                                                                                                                                                         | hg19, UCSC Genome Browser                                                                                                                                                                                                                                                                                                                                                                                                                                                                                                          |
| <b>Variant calling software</b>       | Genome Analysis Toolkit (GATK) Unified Genotyper (85)                                                                                                                                                                                                                                                                                                                             | Genome Analysis Toolkit (GATK) Unified Genotyper and SAMtools (85, 86)                                                                                                                                                                                                                                                                                                            | Genome Analysis Toolkit (GATK) Unified Genotyper (85)                                                                                                                                                                                                                                                                                                                             | Genome Analysis Toolkit (GATK) Unified Genotyper (85); Larger structural variant calling was performed using Manta (84)                                                                                                                                                                                                                                                                                                                                                                                                                                                             | Genome Analysis Toolkit (GATK) Unified Genotyper (85)                                                                                                                                             | Genome Analysis Toolkit (GATK) Unified Genotyper (85)                                                                                                                                                                                                                                                                                                                                                                                                                                                                              |
| <b>Analysis/filtering software</b>    | Clinical Sequence Analyzer and Miner (Wuxi NextCODE)                                                                                                                                                                                                                                                                                                                              | GenomeComb (87)                                                                                                                                                                                                                                                                                                                                                                   | Clinical Sequence Analyzer and Miner (Wuxi NextCODE)                                                                                                                                                                                                                                                                                                                              | In-house developed software, Codicem.                                                                                                                                                                                                                                                                                                                                                                                                                                                                                                                                               | Illumina DRAGEN Bio-IT Platform v.2.03 and PerkinElmer's internal ODIN v.1.01 software                                                                                                            | VariantDB (88)                                                                                                                                                                                                                                                                                                                                                                                                                                                                                                                     |
| <b>Filtering criteria</b>             | Frequency $\leq$ 0.5% of the variants in public exome variant repositories (Exome Aggregation Consortium, 1000 Genomes Project, Exome Variant Server, in-house data); variants with impact on the encoded protein (missense, nonsense, frame shift, in-frame insertions/deletions and splice site variants); read depth $\geq$ 7; minimal heterozygous call percentage $\geq$ 20% | Frequency $\leq$ 0.5% of the variants in public exome variant repositories (Exome Aggregation Consortium, 1000 Genomes Project, Exome Variant Server, in-house data); variants with impact on the encoded protein (missense, nonsense, frame shift, in-frame insertions/deletions and splice site variants); read depth $\geq$ 7; minimal heterozygous call percentage $\geq$ 20% | Frequency $\leq$ 0.5% of the variants in public exome variant repositories (Exome Aggregation Consortium, 1000 Genomes Project, Exome Variant Server, in-house data); variants with impact on the encoded protein (missense, nonsense, frame shift, in-frame insertions/deletions and splice site variants); read depth $\geq$ 7; minimal heterozygous call percentage $\geq$ 20% | Exclusion of variants with low quality, present on an internally curated red herring list, within known polymorphic repeats that are not disease associated, <15% of reads supporting the variant call; Exclusion of variants with a MAF >5% according to ExAC, TGP, or gnomAD (unless they were identified as pathogenic or likely pathogenic in ClinVar, or identified as high confidence disease associated variants in HGMD; Inclusion of variants with impact on the encoded protein (missense, nonsense, frame shift, in-frame insertions/deletions and splice site variants) | No filtering, all sequence variants are assigned an interpretation category (Pathogenic, Likely Pathogenic, Variant of Uncertain Significance, Likely Benign and Benign) per ACMG Guidelines (89) | Frequency $\leq$ 2% of the variants in public exome/genome variant repositories (Genome Aggregation Database, gnomAD)); variants with impact on the encoded protein (missense, nonsense, frameshift, inframe insertions/deletions, splice site, start and stop loss variants); read depth $\geq$ 5; minimal allelic ratio $\geq$ 15%. Analysis of variants was limited to genes listed in a predefined myopathy gene panel supplemented with genome-wide analysis based on HPO term associations (MOON software, Diploid/Invitae). |
| <b>Sanger sequencing confirmation</b> | Yes, in all available individuals                                                                                                                                                                                                                                                                                                                                                 | Yes, in all available individuals                                                                                                                                                                                                                                                                                                                                                 | Yes, in all available individuals                                                                                                                                                                                                                                                                                                                                                 | Yes, in all available individuals                                                                                                                                                                                                                                                                                                                                                                                                                                                                                                                                                   |                                                                                                                                                                                                   | Only for variants read depth < 30 or allelic ratio <40% or >60% for heterozygous variants.                                                                                                                                                                                                                                                                                                                                                                                                                                         |

84. Li H, and Durbin R. Fast and accurate long-read alignment with Burrows-Wheeler transform. *Bioinformatics*. 2010;26(5):589-95.
85. Chen X, Schulz-Trieglaff O, Shaw R, Barnes B, Schlesinger F, Kallberg M, et al. Manta: rapid detection of structural variants and indels for germline and cancer sequencing applications. *Bioinformatics*. 2016;32(8):1220-2.
86. McKenna A, Hanna M, Banks E, Sivachenko A, Cibulskis K, Kernysky A, et al. The Genome Analysis Toolkit: a MapReduce framework for analyzing next-generation DNA sequencing data. *Genome Res*. 2010;20(9):1297-303.
87. Li H, Handsaker B, Wysoker A, Fennell T, Ruan J, Homer N, et al. The Sequence Alignment/Map format and SAMtools. *Bioinformatics*. 2009;25(16):2078-9.
88. Reumers J, De Rijk P, Zhao H, Liekens A, Smeets D, Cleary J, et al. Optimized filtering reduces the error rate in detecting genomic variants by short-read sequencing. *Nat Biotechnol*. 2011;30(1):61-8.
89. Vandeweyer G, Van Laer L, Loeys B, Van den Bulcke T, and Kooy RF. VariantDB: a flexible annotation and filtering portal for next generation sequencing data. *Genome Med*. 2014;6(10):74.
90. Richards S, Aziz N, Bale S, Bick D, Das S, Gastier-Foster J, et al. Standards and guidelines for the interpretation of sequence variants: a joint consensus recommendation of the American College of Medical Genetics and Genomics and the Association for Molecular Pathology. *Genet Med*. 2015;17(5):405-24.
