# Supplementary material for: Characterization of HNRNPA1 mutations defines diversity in pathogenic mechanisms and clinical presentation
Source: PubMed Central journal article supplement (PMC8410042; doi:10.1172/jci.insight.148363), 2021-07-22
Supplement: jciinsight-6-148363-s053.pdf [file jciinsight-6-148363-s053.pdf]

**Table 1 HNRNPA1 mutations leading to a broad spectrum of phenotypes**

| Individual                              | A:II:1                       | B:II:1                                          | B:II:2                                 | C:II:2                                                                   | C:III:1                         | D:II:1                                             | E:II:2                                      | F:I:1                                            |
|-----------------------------------------|------------------------------|-------------------------------------------------|----------------------------------------|--------------------------------------------------------------------------|---------------------------------|----------------------------------------------------|---------------------------------------------|--------------------------------------------------|
| <b>Gender</b>                           | Male                         | Female                                          | Female                                 | Female                                                                   | Male                            | Female                                             | Male                                        | Male                                             |
| <b>Parental consanguinity</b>           | No                           | Yes                                             | Yes                                    | No                                                                       | No                              | No                                                 | No                                          | No                                               |
| <b>Ethnicity</b>                        | Polish                       | Moroccan                                        | Moroccan                               | Dutch                                                                    | Dutch                           | Indian                                             | Caucasian American                          | Belgian                                          |
| <b>Current age (age at death)</b>       | 43 years                     | 44 years                                        | 45 years                               | 44 years                                                                 | 14 years                        | 35 years                                           | 48 years                                    | † 64 years                                       |
| <b>Mutation</b>                         |                              |                                                 |                                        |                                                                          |                                 |                                                    |                                             |                                                  |
| <b>Genomic position (hg19)</b>          | Chr12: 54678040<br>A>G       | Chr12: 54677706<br>C>G                          | Chr12: 54677706<br>C>G                 | Chr12: 54678095<br>T>G                                                   | Chr12: 54678095<br>T>G          | Chr12:54677766-54678265 deletion<br>500bp deletion | Chr12:54677629A<br>>T                       | Chr12:54678095<br>T>C                            |
| <b>cDNA</b>                             | NM_002136: c.908-2A>G        | NM_002136: c.862C>G                             | NM_002136: c.862C>G                    | NM_002136: c.961T>G                                                      | NM_002136: c.961T>G             | NM_002136: c.907+15_*5-68del                       | NM_002136: c.785A>T                         | NM_002136: c.961T>C                              |
| <b>Protein</b>                          | p.G304Nfs*3                  | p.P288A                                         | p.P288A                                | p.*321Eext*6                                                             | p.*321Eext*6                    | p.G304Nfs*3                                        | p.D262V                                     | p.*321Qext*6                                     |
| <b>Clinical features</b>                |                              |                                                 |                                        |                                                                          |                                 |                                                    |                                             |                                                  |
| <b>Overall phenotype</b>                | Distal pure motor neuropathy | Motor neuron disease                            | Motor Neuron disease                   | Distal myopathy                                                          | Distal myopathy                 | Distal myopathy                                    | Distal myopathy                             | Distal myopathy                                  |
| <b>Age at onset</b>                     | 15 years                     | 22 years                                        | 43 years                               | 9 years                                                                  | 8 years                         | 22 years                                           | 36 years                                    | 12 years                                         |
| <b>Symptoms at onset</b>                | Wasting hand intrinsics      | Paresis of left hand without sensory impairment | Swallowing difficulties and dysarthria | Difficulties with hand function, mild facial weakness, fatigue at age 12 | Foot drop R                     | Hand weakness while writing                        | Weakness foot R frequent tripping and falls | Wasting of hand intrinsics, weakness lower limbs |
| <b>Age at last examination</b>          | 40 years                     | 43 years                                        | 44 years                               | 43 years                                                                 | 13 years                        | 33 years                                           | 48 years                                    | 64 years                                         |
| <b>Walking (canes, wheelchair,....)</b> | Ambulant                     | Ambulant                                        | Ambulant                               | Wheelchair use: intermittent (28y) permanent (34y)                       | Ambulant                        | Ambulant                                           | Cane, hand rails when going up the stairs   | Wheelchair bound                                 |
| <b>Walking on toes</b>                  | Yes                          | Yes                                             | Yes                                    | No                                                                       | Yes                             | No                                                 | Yes                                         | No                                               |
| <b>Walking on heels</b>                 | No                           | Yes                                             | yes                                    | No                                                                       | No                              | No                                                 | No                                          | No                                               |
| <b>Foot deformities</b>                 | Slight <i>pes cavus</i>      | -                                               | No                                     | Slight hammer toes                                                       | <i>Pes planus</i> on right foot | No                                                 | High arched feet, hammer toes               | <i>Pes equinovari</i>                            |

|                                                           |                                 |                                                                          |                                                                  |                                                     |                                                              |                                            |                                                                            |                                                    |
|-----------------------------------------------------------|---------------------------------|--------------------------------------------------------------------------|------------------------------------------------------------------|-----------------------------------------------------|--------------------------------------------------------------|--------------------------------------------|----------------------------------------------------------------------------|----------------------------------------------------|
| <b>Muscle atrophy UL</b>                                  | Hand intrinsics, distal forearm | R>L                                                                      | Hand intrinsics R                                                | Generalized                                         | Thenar L                                                     | Hand intrinsics R>L                        | No                                                                         | Pronounced                                         |
| <b>Muscle atrophy LL</b>                                  | Yes                             | No                                                                       | No                                                               | Generalized                                         | No                                                           | Yes                                        | No                                                                         | Pronounced                                         |
| <b>Weakness proximal UL</b>                               | Not measured                    | Deltoid >biceps and triceps +++ bilaterally, neck flexors and abdominals | No                                                               | Shoulder abduction 2/5, Shoulder anteflexion mild   | No                                                           | No                                         | No                                                                         | Biceps 0/5, triceps 2-/5, shoulder abduction 1-3/5 |
| <b>Weakness distal UL</b>                                 | Not measured                    | Hand intrinsics +++ bilaterally                                          | Weakness (2/5) right abductor pollicis brevis and I interosseous | Hand intrinsics 2/5, finger flexion/extension 0/5   | Opponens pollicis MRC 5-/5 L                                 | finger and wrist extension 1/5 R, 4-4+/5 L | No                                                                         | 0/5                                                |
| <b>Weakness proximal LL</b>                               | Not measured                    | No                                                                       | No                                                               | Knee extension 1/5, hip adduction/abduction 1/5     | No                                                           | No                                         | Knee flexion/extension 4+/5                                                | 0/5                                                |
| <b>Weakness distal LL</b>                                 | Not measured                    | No                                                                       | No                                                               | 0/5                                                 | Foot plantar flexion 5/5, Foot/toe dorsiflexion 3/5 L, 0/5 R | ankle dorsiflexion 0/5 R, 4-/5 L           | Foot eversion 4+/5, inversion 5/5, dorsiflexion 3+/5, plantar flexion 4-/5 | tibialis anterior 2/5, otherwise 0/5               |
| <b>Reflexes UL</b>                                        | Very brisk                      | Very brisk                                                               | Brisk                                                            | Absent                                              | Normal                                                       | Trace                                      | Normal                                                                     | Absent                                             |
| <b>Reflexes LL</b>                                        | Brisk                           | Absent                                                                   | Normal                                                           | Absent                                              | Normal                                                       | Trace                                      | Normal                                                                     | Absent                                             |
| <b>Predominance in the hands</b>                          | Yes                             | Yes but also severe in deltoids                                          | Yes                                                              | Yes                                                 | No                                                           | Yes                                        | No                                                                         | Yes (initial presentation)                         |
| <b>Sensory involvement</b>                                | -                               | -                                                                        | -                                                                | -                                                   | -                                                            | No                                         | No                                                                         | No                                                 |
| <b>Pyramidal tract signs (Babinski sign, clonus, ...)</b> | No                              | Bilateral Hoffmann-Trömner, no Babinski sign                             | Right Hoffmann-Trömner, no Babinski sign                         | No                                                  | No                                                           | No                                         | No                                                                         | No                                                 |
| <b>Respiratory difficulties</b>                           | No                              | Vital capacity 59%                                                       | No                                                               | Vital capacity 70%, aggravated during cold or fever | No                                                           | Forced vital capacity 76%                  | No                                                                         | Non-invasive ventilation (BiPAP), cough assist     |
| <b>Facial weakness</b>                                    | No                              | Yes                                                                      | No                                                               | Yes, very pronounced                                | No                                                           | Yes                                        | No                                                                         | Yes, very pronounced                               |

|                                |                                                                                  |                              |                               |                                                                |                                      |                                                                     |                                                                   |                                                                                           |
|--------------------------------|----------------------------------------------------------------------------------|------------------------------|-------------------------------|----------------------------------------------------------------|--------------------------------------|---------------------------------------------------------------------|-------------------------------------------------------------------|-------------------------------------------------------------------------------------------|
| <b>Other clinical features</b> | Mild thoracic scoliosis, depression, mild deformation of the L1 and L2 vertebrae | -                            | Tongue atrophy and dysarthria | Dysarthria, most likely due to the very severe facial weakness | -                                    | Asymmetry of weakness, scapular winging                             | -                                                                 | Percutaneous endoscopic gastrostomy, muscle contractures UL and LL, dysphagia, titubation |
| <b>Additional testing</b>      |                                                                                  |                              |                               |                                                                |                                      |                                                                     |                                                                   |                                                                                           |
| <b>NCS</b>                     | Pure motor axonal neuropathy                                                     | Pure motor axonal neuropathy | -                             | Pure motor axonal neuropathy                                   | Normal                               | Decreased amplitude median and peroneal motor                       | low amplitude peroneal motor consistent with chronic myopathy     | Normal, very small CMAPs                                                                  |
| <b>Needle EMG</b>              | Chronic neurogenic                                                               | Not performed                | Not performed                 | Myopathic, proximal UL                                         | Myopathic, distal and proximal       | Irritative distal predominant myopathy.                             | Chronic myopathic changes with muscle membrane irritability in LL | Chronic myopathic                                                                         |
| <b>Nerve biopsy</b>            | Very mild axonal neuropathy with secondary demyelination (25y)                   | Not performed                | Not performed                 | Not performed                                                  | Not performed                        | Not performed                                                       | Not performed                                                     | Normal                                                                                    |
| <b>Muscle biopsy</b>           | Not performed                                                                    | Not performed                | Not performed                 | Angular fibers, no type grouping (17y)                         | Slight clustering type 1 fibers (8y) | Myofibrillar disorganization, rimmed vacuoles no inflammation (33y) | Chronic myopathy with rimmed vacuoles (45 years)                  | Type 1 atrophy, limited rimmed vacuoles, centralized nuclei type 2 fibers (13y)           |

L, left: LL, lower limb(s); MRC, medical research council: NCS, nerve conduction studies: R, right: UL, upper limb(s); (-), absent/unknown
